# Supplementary material
Source: Springer Nature journal article supplement (https://www.springermedizin.de/resource/supplementary/12943_2008_353_MOESM3_ESM.pdf/9553994)

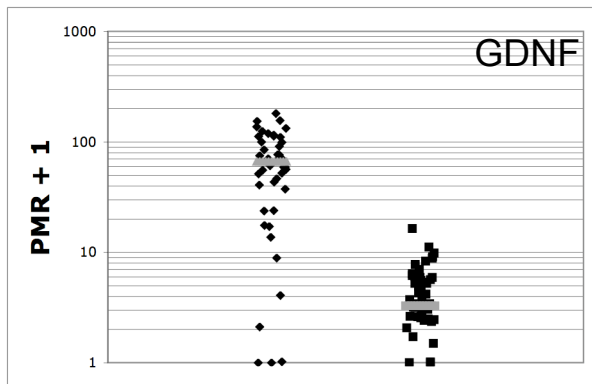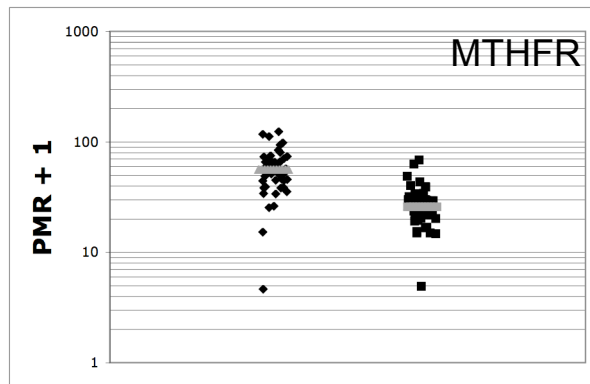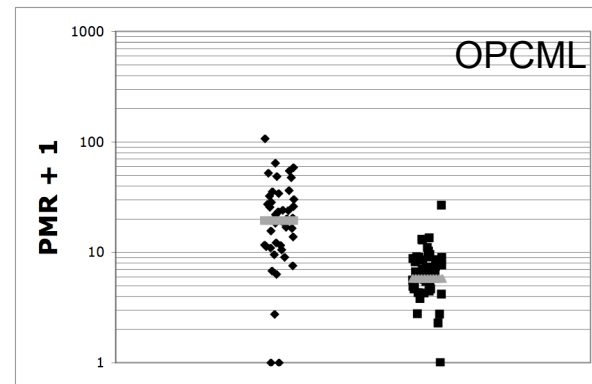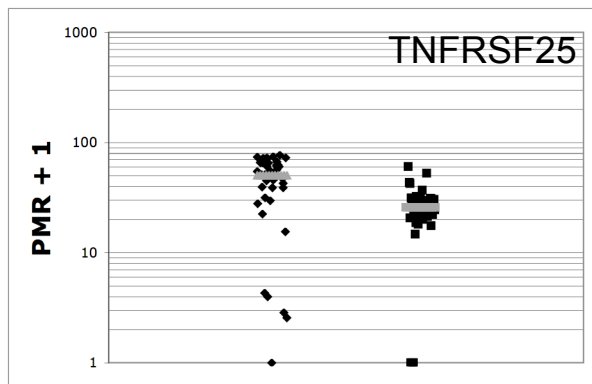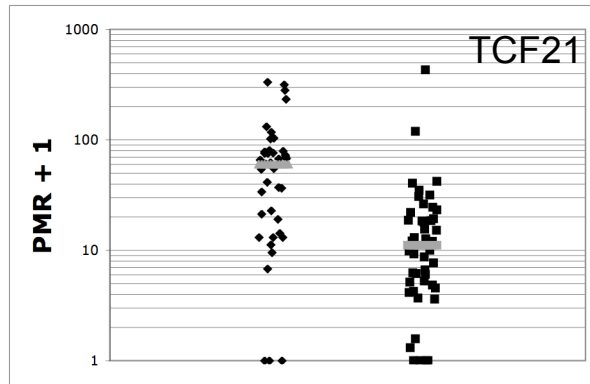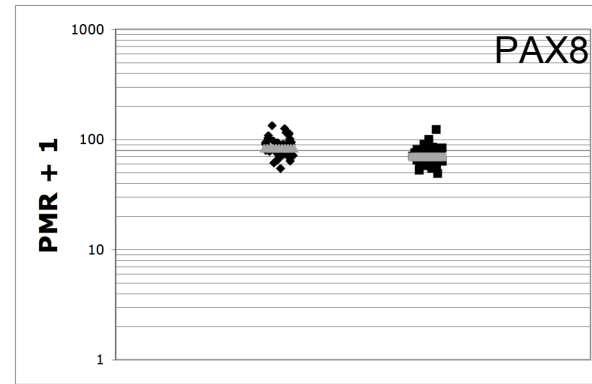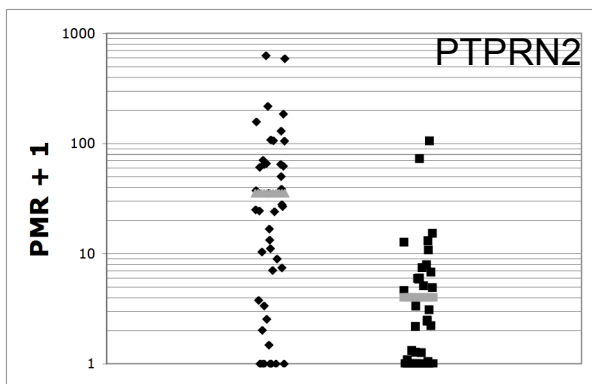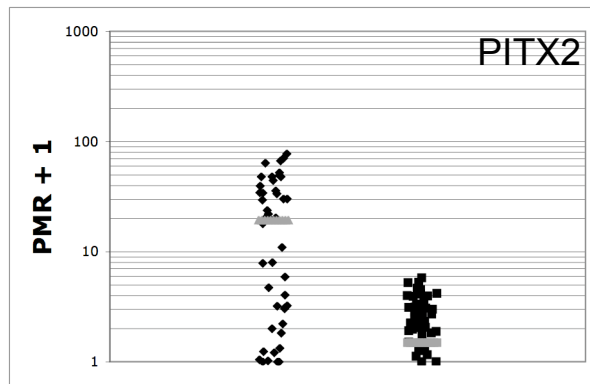

**T AdjNTL**

**T AdjNTL**

**T AdjNTL**

Supplement: MOESM3 [file 9553994]
